# Supplementary material
Source: publisher figshare collection journal article supplement (https://frontiersin.figshare.com/ndownloader/files/28407504)
Supplement: Supplementary file [file 28407504]

|              |      | Prediction (%) |      |          |
|--------------|------|----------------|------|----------|
|              |      | Sleep          | Wake | $\Sigma$ |
| Ground Truth | N3   | 12.0           | 0.9  | 12.9     |
|              | N2   | 21.9           | 1.9  | 23.8     |
|              | N1   | 46.0           | 9.1  | 55.1     |
|              | REM  | 48.9           | 4.3  | 53.2     |
|              | Wake | 33.9           | 16.8 | 50.7     |

$\Sigma$ : Summation

**Table 2.** To investigate the cause of uncertainty for non-apneic epochs, the ground truth sleep stages of these epochs were extracted for CNN\_Test. The percentage indicates the **ratio of uncertain non-apneic epochs to the number of epochs in a specific sleep stage**. Thus, the right column  $\Sigma$  is the total ratio of uncertain non-apneic epochs per sleep stage. It is observed that the classes N1 and REM had the largest ratio of uncertain non-apneic epochs, being 55.1% and 53.2%, respectively (indicated in grey). However, uncertain predictions did not necessarily imply incorrect predictions. Nevertheless, classes N1 and REM also had the largest ratio of uncertain non-apneic epochs which were wrongly predicted, respectively 9.1% and 4.3% (indicated in grey).
